# Supplementary material
Source: MDPI journal article supplement (https://www.mdpi.com/2071-1050/15/12/9811)
Supplement: s1 [file s1]

## Supplementary Information

# Assessing Impacts of Land Use and Land Cover (LULC) Change on Stream Flow and Runoff in Rur Basin, Germany

Saurabh Shukla<sup>1,2</sup>, Tesfa Worku Meshesha<sup>1</sup>, Indra S. Sen<sup>2\*</sup>, Roland Bol<sup>3</sup>, Heye Bogena<sup>3</sup> and Junye Wang<sup>1\*</sup>

<sup>1</sup>Faculty of Science and Technology, Athabasca University, Athabasca, Alberta T9S 3A3, Canada

<sup>2</sup>Department of Earth Sciences, Old Sac Area, Block-C, Ground Floor, Indian Institute of Technology Kanpur, Kanpur UP 208016, India

<sup>3</sup>Institute of Bio- and Geosciences, Agrosphere (IBG-3), Forschungszentrum Jülich GmbH, Jülich, North Rhine-Westphalia 52425, Germany

\*Corresponding authors: junyew@athabascau.ca, and isen@iitk.ac.in

## This File contains:

Figures S1–S5, Tables S1–S6, and their captions

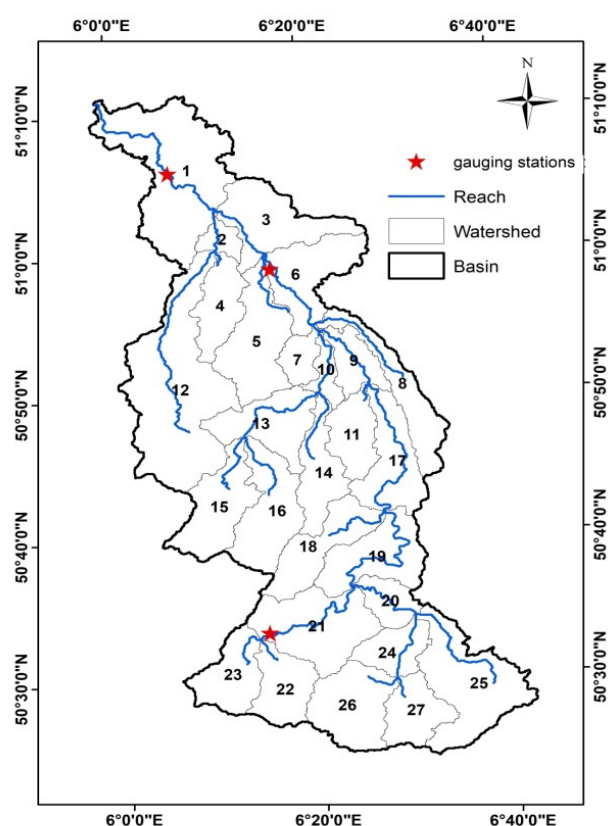

**Figure S1.** Sub-basin boundaries (formed during watershed delineation) and reach network with monitoring stations.

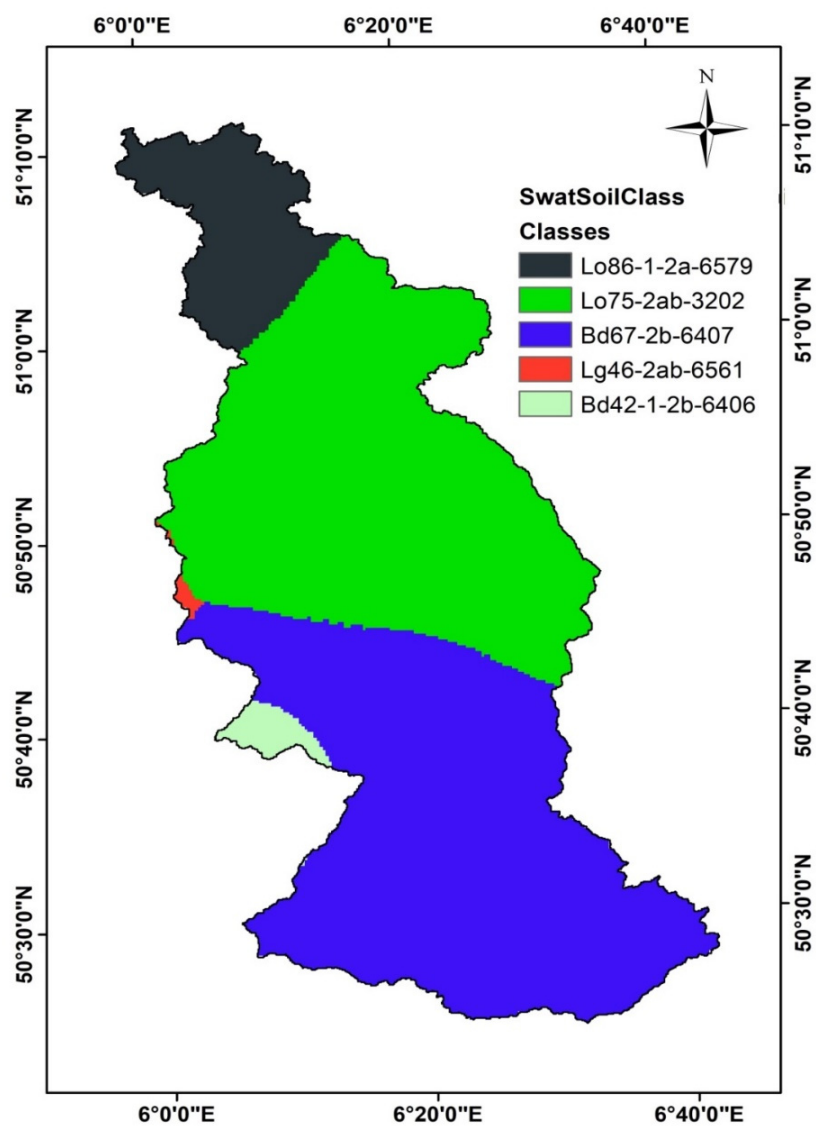

Figure S2. Soil classes in the Rur catchment.

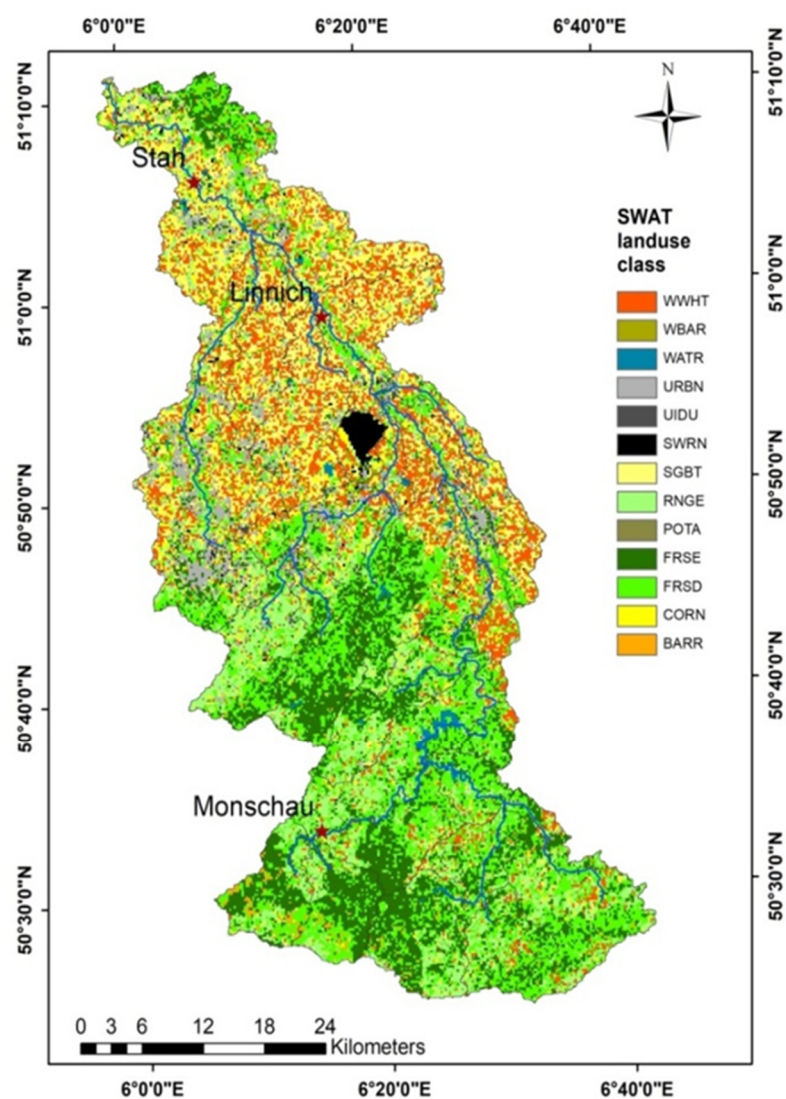

Figure S3. Land Use map of the Rur catchment classified into 13 land use classes.

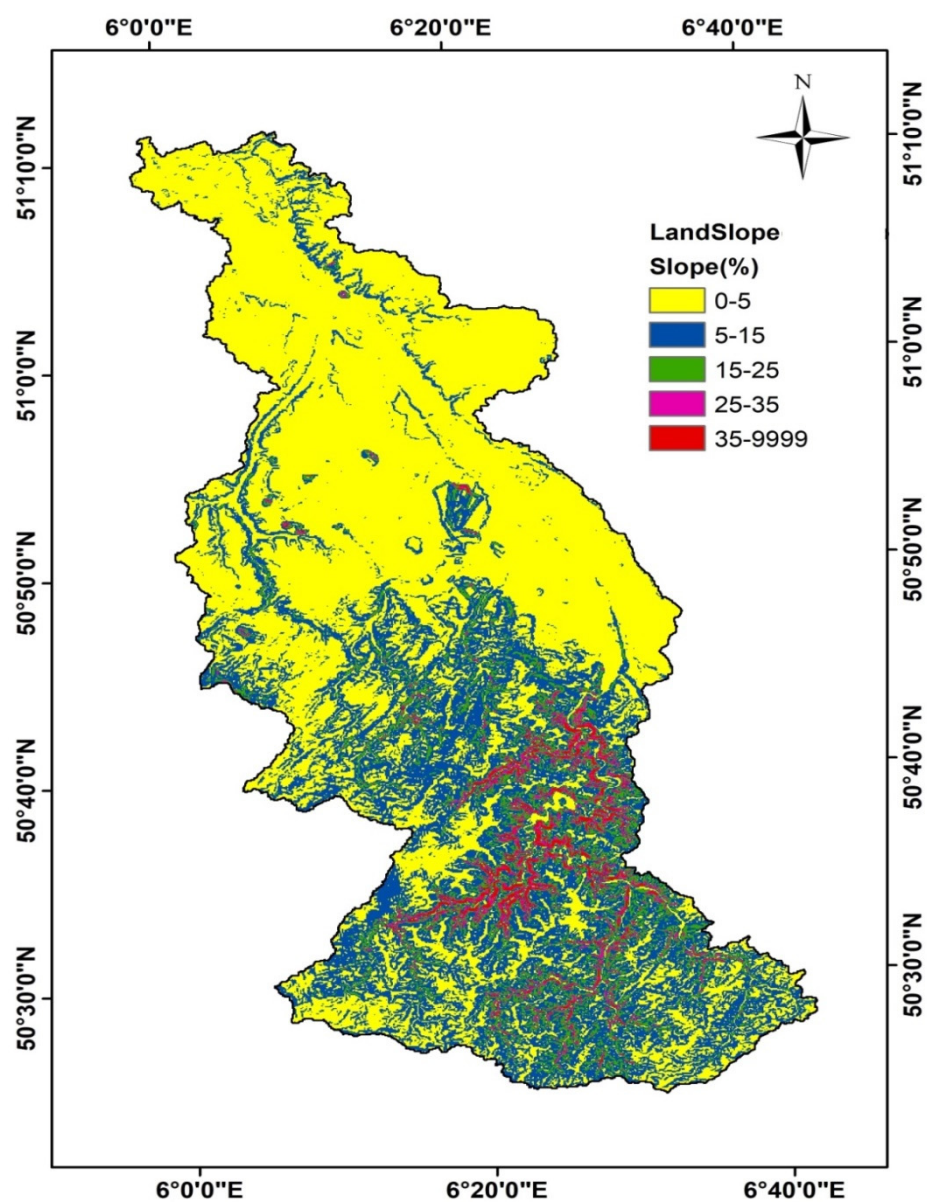

**Figure S4.** Slope classes for the Rur catchment.

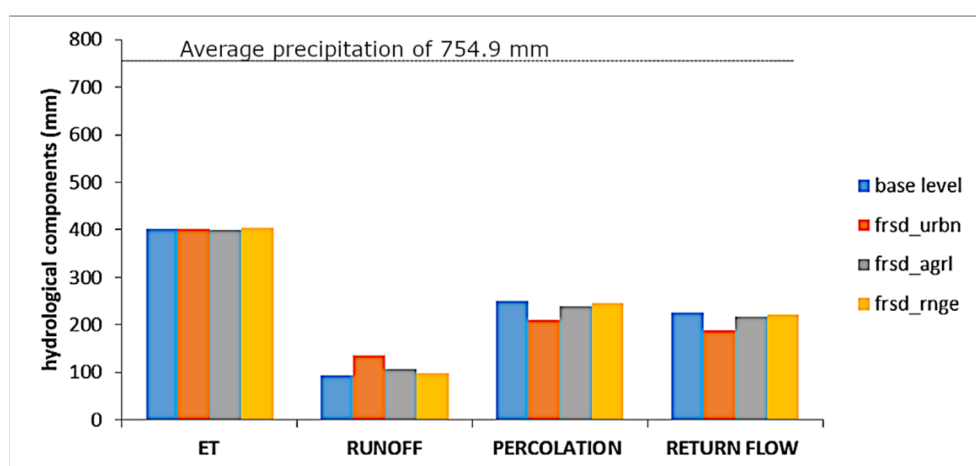

**Figure S5.** The evapotranspiration (ET), runoff, percolation and return flow for different scenarios.

**Table S1.** Characteristics and texture of the SWAT soil classes used in the simulations. (<http://www.fao.org/soils-portal/data-hub/soil-maps-and-databases/en/>).

| SWAT soil class | Clay % | Silt % | Sand % | Texture    |
|-----------------|--------|--------|--------|------------|
| Lo86-1-2a-6579  | 15     | 22     | 62     | Sandy-loam |
| Lo75-2ab-3202   | 21     | 34     | 44     | loam       |
| Bd67-2b-6407    | 20     | 32     | 48     | loam       |
| Lg46-2ab-6561   | 21     | 29     | 50     | loam       |
| Bd42-1-2b-6406  | 20     | 30     | 50     | loam       |

**Table S2.** Weather stations used for temperature, precipitation and relative humidity.

| Station ID | Name | Latitude  | Longitude | Elevation (m.a.s.l) |
|------------|------|-----------|-----------|---------------------|
| 1          | Hein | 51.0410 N | 6.1040 E  | 57                  |
| 2          | Kall | 50.5020 N | 6.5260 E  | 505                 |
| 3          | Nide | 50.6740 N | 6.4240 E  | 350                 |

**Table S3.** Different model inputs, their description, and sources.

| S.no | Spatial data                  | Description                                                                                                                | Source                                                                                                                                                                                                  |
|------|-------------------------------|----------------------------------------------------------------------------------------------------------------------------|---------------------------------------------------------------------------------------------------------------------------------------------------------------------------------------------------------|
| 1    | Digital Elevation Model (DEM) | 90 m × 90 m grid DEM for watershed delineation which is helpful in stream definition and calculating sub-basin parameters. | Shuttle Radar Topography Mission (SRTM) of USGS                                                                                                                                                         |
| 2    | Landuse and landcover (LULC)  | 2006 LULC map in 100 m × 100 m resolution from Corine Landcover Map (CLC) data                                             | <a href="https://land.copernicus.eu/pan-european/corine-land-cover">https://land.copernicus.eu/pan-european/corine-land-cover</a>                                                                       |
| 3    | Soil data                     | The soil data in 100 m × 100 m resolution from FAO.                                                                        | Food And Organization (FAO) Digital Soil Map<br><a href="http://www.fao.org/soils-portal/data-hub/soil-maps-and-databases/en/">http://www.fao.org/soils-portal/data-hub/soil-maps-and-databases/en/</a> |
| 4    | Weather data                  | Weather data (Temperature, precipitation, relative humidity, solar radiation, wind speed)                                  | TERENO observatory, Germany                                                                                                                                                                             |
| 5    | Hydrological data             | Hydrological data (runoff)                                                                                                 | TERENO observatory, Germany                                                                                                                                                                             |

**Table S4.** Calibrated parameter for Monschau, Linnich and Stah stations. The parameters are ordered as per sensitivity rank with the most sensitive parameter at the top.

| Monschau station |                |                                                                                   |                        |               |       |
|------------------|----------------|-----------------------------------------------------------------------------------|------------------------|---------------|-------|
| Rank.            | Parameter name | Physical description                                                              | Lower and upper bounds | Fitted values | Units |
| 1.               | CN2            | Initial curve number II                                                           | -0.5 to 0.1            | -0.473        | none  |
| 2.               | GW_DELAY       | Groundwater delay                                                                 | 0 to 50                | 10.25         | days  |
| 3.               | ALPHA_BF       | Base flow alpha factor                                                            | 0 to 1                 | 0.265         | none  |
| 5.               | GWQMN          | Threshold depth of water in the shallow aquifer required for return flow to occur | 0 to 50                | 38.75         | Mm    |
| 6                | SLS_SUBBSN     | Average slope length                                                              | 0.0995 to 0.1476       | 0.136         | none  |
| 7                | HRU_SLP        | Average slope steepness                                                           | 0 to 1                 | 0.695         | Mm    |
| 8                | SOL_K          | Saturated hydraulic conductivity                                                  | 0 to 1                 | 0.755         | none  |
| 9                | ESCO           | Soil evaporation compensation factor                                              | 0 to 1                 | 0.855         | none  |
| 10               | OV_N           | Manning's n value for overland flow                                               | 0.01 to 1              | 0.5           | none  |
| 11               | SOL_AWC        | Available water capacity of the soil layer                                        | 0 to 1                 | 0.805         | none  |
| 12               | SOL_BD()       | Moist bulk density                                                                | 0 to 1                 | 0.595         | none  |
| 13               | REVAPM         | Threshold depth of water in the shallow aquifer for "revap" to occur              | 0 to 4                 | 3.9           | Mm    |
| Linnich station  |                |                                                                                   |                        |               |       |
| 1                | CN2            | Initial curve number II                                                           | -0.7 to 0.1            | -0.415        | none  |
| 2                | AL-            | Base flow alpha factor                                                            | 0 to 1                 | 0.635         | none  |

|                     |                |                                                                                   |                     |        |      |
|---------------------|----------------|-----------------------------------------------------------------------------------|---------------------|--------|------|
|                     | PHA_BF         |                                                                                   |                     |        |      |
| 3                   | GWQMN          | Threshold depth of water in the shallow aquifer required for return flow to occur | 0 to 50             | 33     | Mm   |
| 4                   | GW_DEL<br>AY   | Groundwater delay                                                                 | 0 to 50             | 13.95  | days |
| 5                   | SLS_SUB<br>BSN | Average slope length                                                              | 0.0995 to<br>0.1476 | 0.147  | none |
| 6                   | SOL_BD()       | Moist bulk density                                                                | 0 to 1              | 0.695  | none |
| 7                   | GW_REV<br>AP   | Groundwater "revap" coefficient                                                   | 0.02 to 0.2         | 0.161  | Mm   |
| 8                   | HRU_SLP        | Average slope steepness                                                           | 0 to 1              | 0.885  | Mm   |
| 9                   | SOL_K          | Saturated hydraulic conductivity                                                  | 0 to 1              | 0.715  | none |
| 10                  | ESCO           | Soil evaporation compensation factor                                              | 0 to 1              | 0.675  | none |
| 11                  | SOL_AWC        | Available water capacity of the soil layer                                        | 0 to 1              | 0.725  | none |
| 12                  | REVAPM<br>N    | Threshold depth of water in the shallow aquifer for "revap" to occur              | 0 to 4              | 0.82   | Mm   |
| 13                  | OV_N           | Manning's n value for overland flow                                               | 0.01 to 1           | 0.837  | none |
| <b>Stah station</b> |                |                                                                                   |                     |        |      |
| 1.                  | CN2            | Initial curve number II                                                           | -0.7 to 0.1         | -0.415 | none |
| 2                   | AL-<br>PHA_BF  | Base flow alpha factor                                                            | 0 to 1              | 0.635  | none |
| 3                   | GWQMN          | Threshold depth of water in the shallow aquifer required for return flow to occur | 0 to 50             | 33     | Mm   |
| 4                   | GW_DEL<br>AY   | Groundwater delay                                                                 | 0 to 50             | 13.95  | days |
| 5                   | SLS_SUB<br>BSN | Average slope length                                                              | 0.0995 to<br>0.1476 | 0.147  | none |
| 6                   | SOL_BD()       | Moist bulk density                                                                | 0 to 1              | 0.695  | none |
| 7                   | GW_REV<br>AP   | Groundwater "revap" coefficient                                                   | 0.02 to 0.2         | 0.161  | Mm   |
| 8                   | HRU_SLP        | Average slope steepness                                                           | 0 to 1              | 0.885  | Mm   |
| 9                   | SOL_K          | Saturated hydraulic conductivity                                                  | 0 to 1              | 0.715  | none |
| 10                  | ESCO           | Soil evaporation compensation factor                                              | 0 to 1              | 0.675  | none |
| 11                  | SOL_AWC        | Available water capacity of the soil layer                                        | 0 to 1              | 0.725  | none |
| 12                  | REVAPM<br>N    | Threshold depth of water in the shallow aquifer for "revap" to occur              | 0 to 4              | 0.82   | Mm   |
| 13                  | OV_N           | Manning's n value for overland flow                                               | 0.01 to 1           | 0.837  | none |

**Table S5.** Description of all the land use land cover scenarios used in this study.

| Scenario code | Description                                         | Final configuration (% area relative to total catchment) |
|---------------|-----------------------------------------------------|----------------------------------------------------------|
| Base level    | Using the land-use map for 2006                     | Unchanged                                                |
| frsd_urban    | deciduous forest converted to the urban settlement  | 0% frsd and 29.55% urban                                 |
| frsd_agri     | deciduous forest converted to the agricultural land | 0 % frsd and 57.23% agri                                 |
| frsd_rnge     | deciduous forest converted to the grasslands        | 0 % frsd and 39.37% rng                                  |

**Table S6.** Mann-Kendall test results for trend analysis in the average annual observed runoff data (2000-2015).

| Station   | z      | Significance level | Trend                                         |
|-----------|--------|--------------------|-----------------------------------------------|
| Linnich   | -0.765 | 0.444              | No statistically significant decreasing trend |
| Monschau  | -0.855 | 0.392              | No statistically significant decreasing trend |
| Selhausen | -2.03  | 0.042              | Statistically significant decreasing trend    |
| Stah      | -1.936 | 0.052              | No statistically significant decreasing trend |
| Kall      | -3.287 | 0.001              | Statistically significant decreasing trend    |
